# Supplementary material
Source: HighWire-hosted journal article supplement (https://www.annfammed.org/highwire/filestream/14786/field_highwire_adjunct_files/0/LeslieSupp.pdf)
Supplement: LeslieSupp.pdf [file LeslieSupp.pdf]

## Supplemental material for

Leslie M, Pinto N, Fadaak R. Improving conversations with COVID-19 vaccine hesitant patients: action research to support family physicians. *Ann Fam Med*. 2022;20:Online. <https://doi.org/10.1370/afm.2816>

## Vaccine Hesitancy Guide (VHGuide.ca) - Code System

(Updated as of 31 January 2022)

| Codes                                                  | Frequency |
|--------------------------------------------------------|-----------|
| All Codes                                              | 984       |
| Mistrust                                               | 2         |
| Natural Immunity                                       | 7         |
| Clinical Pearls                                        | 63        |
| Exemptions                                             | 49        |
| Exemptions\Mental Health                               | 10        |
| Exemptions\Religious                                   | 5         |
| Exemptions\Allergies                                   | 9         |
| Exemptions\Pregnancy                                   | 2         |
| Children/Pediatrics                                    | 75        |
| Children/Pediatrics\Virus shedding                     | 0         |
| Children/Pediatrics\Risks of COVID vs risks of vaccine | 3         |
| Children/Pediatrics\Developmental/puberty concerns     | 1         |
| Children/Pediatrics\Rushed approval/development        | 2         |
| Children/Pediatrics\Long-term data/effects             | 1         |
| Pregnancy/Fertility/Perinatal [NEW]                    | 71        |

|                                                            |    |
|------------------------------------------------------------|----|
| Pregnancy/Fertility/Perinatal [NEW]\Long-Term Data/Effects | 9  |
| Pregnancy/Fertility/Perinatal [NEW]\Ingredient Concerns    | 3  |
| Pregnancy/Fertility/Perinatal [NEW]\Miscarriage            | 3  |
| Pregnancy/Fertility/Perinatal [NEW]\Fertility              | 1  |
| Pregnancy/Fertility/Perinatal [NEW]\Breastfeeding          | 2  |
| EAASE-Steps                                                | 0  |
| EAASE-Steps\EVOKE                                          | 19 |
| EAASE-Steps\ASK                                            | 3  |
| EAASE-Steps\ASK\SHARE                                      | 39 |
| EAASE-Steps\AFFIRM                                         | 21 |
| EAASE-Steps\ENGAGE                                         | 18 |
| OLD CODES                                                  | -- |
| OLD CODES\Community concerns                               | 13 |
| OLD CODES\Religious Concerns                               | 40 |
| OLD CODES\Independence Concerns                            | 16 |
| OLD CODES\Body Concerns                                    | 28 |
| OLD CODES\Naturalist                                       | 31 |
| OLD CODES\DNA/Cell Integrity                               | 24 |
| OLD CODES\Medically Complex                                | 20 |
| OLD CODES\Science Concerns                                 | 31 |
| OLD CODES\Internet Researcher                              | 35 |
| OLD CODES\Group Trauma                                     | 20 |
| OLD CODES\Personal Trauma                                  | 11 |

|                                          |    |
|------------------------------------------|----|
| OLD CODES\Side effects                   | 30 |
| OLD CODES\First Nations                  | 18 |
| OLD CODES\Needles                        | 28 |
| OLD CODES\Unconcerned                    | 12 |
| OLD CODES\Unconcerned\Already Dealt With | 12 |
| OLD CODES\Unconcerned\Not A Big Deal     | 10 |
| What patients say                        | 55 |
| Follow ups                               | 21 |
| General advice                           | 80 |
| Take Homes                               | 5  |
| Starting the conversation                | 15 |
| GoodStuff                                | 10 |
| Interesting                              | 1  |

\*\*OLD CODES indicate codes that were used to organize the original interviews for VHGuide.ca. All other codes have been used to update the site with new content related to pediatric vaccine hesitancies, medical exemption requests, and fertility-pregnancy concerns.
